# Supplementary material
Source: Springer Nature journal article supplement (https://www.springermedizin.de/resource/supplementary/12943_2010_884_MOESM6_ESM.pdf/9551950)

A

siSmad2

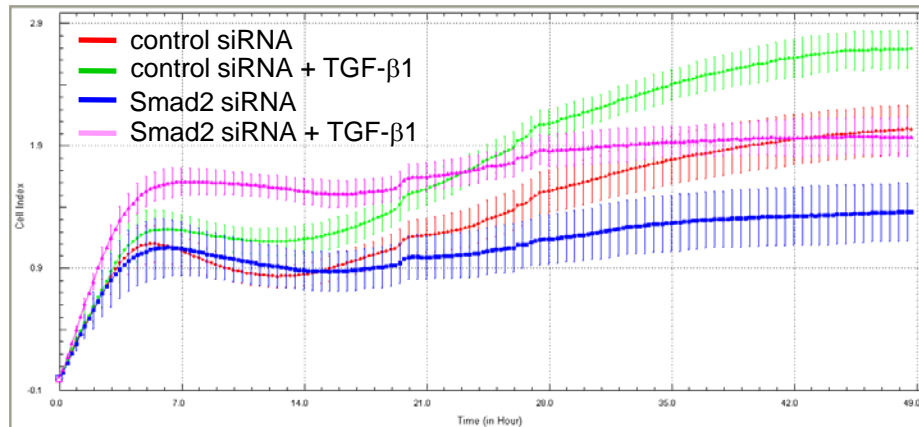

siSmad3

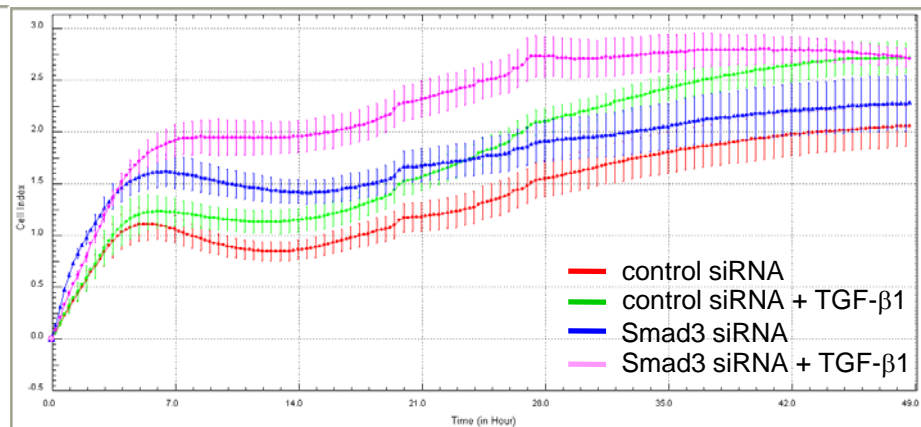

B

MMP-2

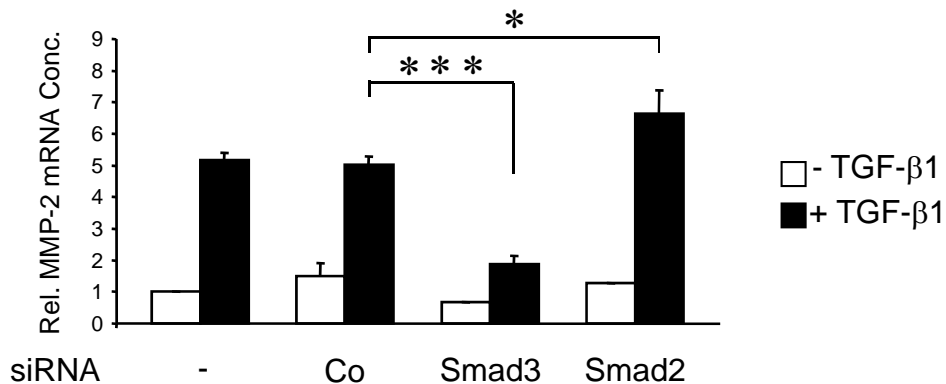

BGN

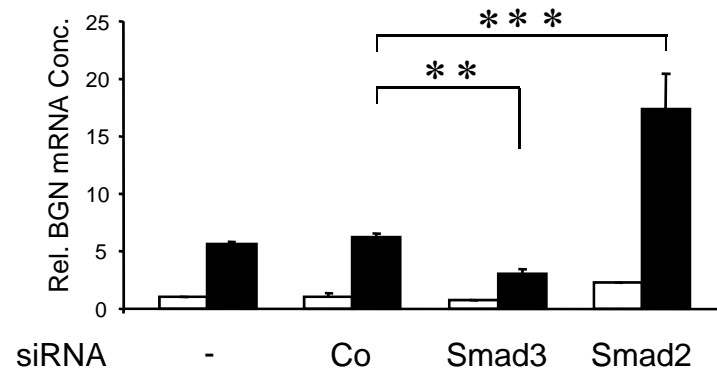

Supplement: MOESM6 [file 9551950]
